# Supplementary material for: Boosting the capacity and stability of a MoO3cathodeviavalence regulation and polypyrrole coating for a rechargeable Zn ion battery
Source: Royal Society of Chemistry journal article supplement (doi:10.1039/d3ra02350h), 2023-01-01
Supplement: d3ra02350h1.pdf [file d3ra02350h1.pdf]

## Supporting Information

### **Boosting the Capacity and Stability of MoO<sub>3</sub> Cathode via Valence Regulation and Polypyrrole Coating for Rechargeable Zn Ion Battery**

Yachen He,<sup>a</sup> Weiwei Xue,<sup>a</sup> Yifeng Huang,<sup>a</sup> Hongwei Tang,<sup>a</sup> Guangxia Wang,<sup>a</sup> Dezhou Zheng,<sup>\*a</sup> Wei Xu,<sup>a</sup> Fuxin Wang<sup>\*a</sup>, Xihong Lu<sup>ab</sup>

*<sup>a</sup>School of Applied Physics and Materials, Wuyi University, Jiangmen 529020, PR China. E-mail: wangfux91@126.com*

*<sup>b</sup>MOE of the Key Laboratory of Bioinorganic and Synthetic Chemistry, The Key Lab of Low-carbon Chem & Energy Conservation of Guangdong Province, School of Chemistry, Sun Yat-Sen University, Guangzhou 510275, PR China*

The specific capacity ( $C_m$ , mAh g<sup>-1</sup>) is calculated by equation (1-1), where  $\Delta t$  (h) is the discharge time,  $I$ (mA) is the current density and  $m$ (g) is the loading mass of the active substance. All current densities in the article are related to the mass of the active material.

$$C_m = \frac{I \times \Delta t}{m} \quad (1-1)$$

Also, the energy density  $E_m$  (Wh kg<sup>-1</sup>) and power density ( $P$ , W kg<sup>-1</sup>) can be calculated for different GCDs profiles according to the following equation, where  $U$ (V) is the voltage window

$$E_m = \frac{I \int U dt}{m} \quad (1-2)$$

$$P = \frac{E_m}{t} \quad (1-3)$$

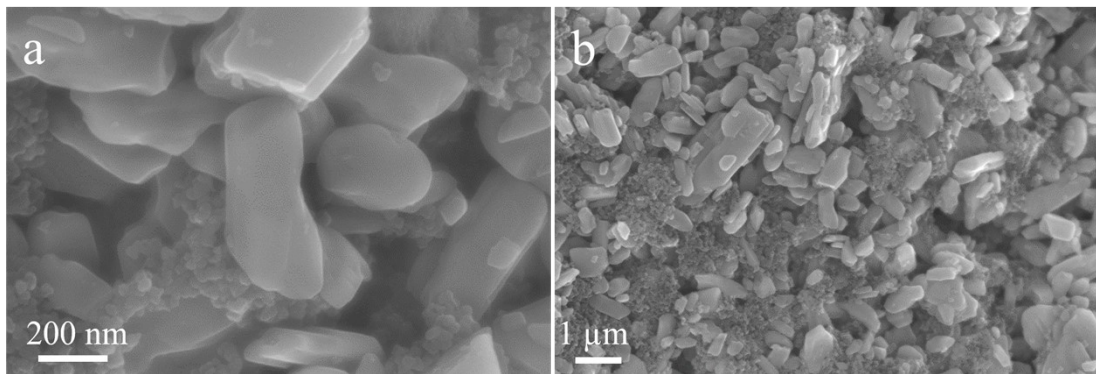

**Figure S1** SEM images of commercial MoO<sub>3</sub>.

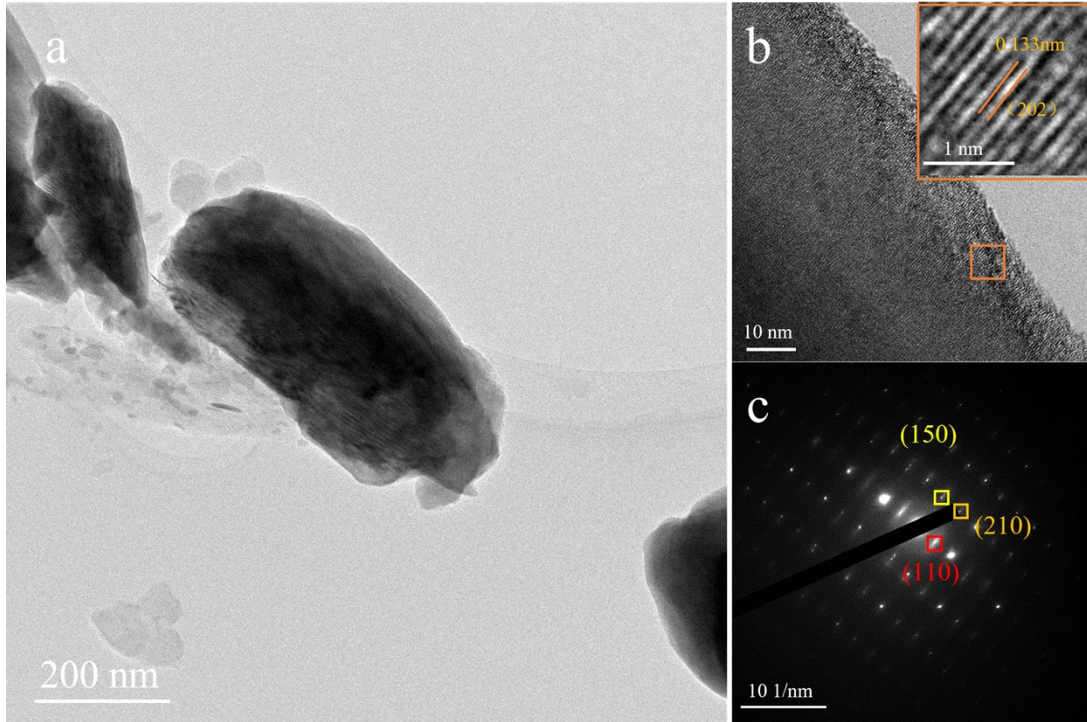

**Figure S2** (a) TEM, (b) HRTEM, and (c) SAED images of commercial  $\text{MoO}_3$ .

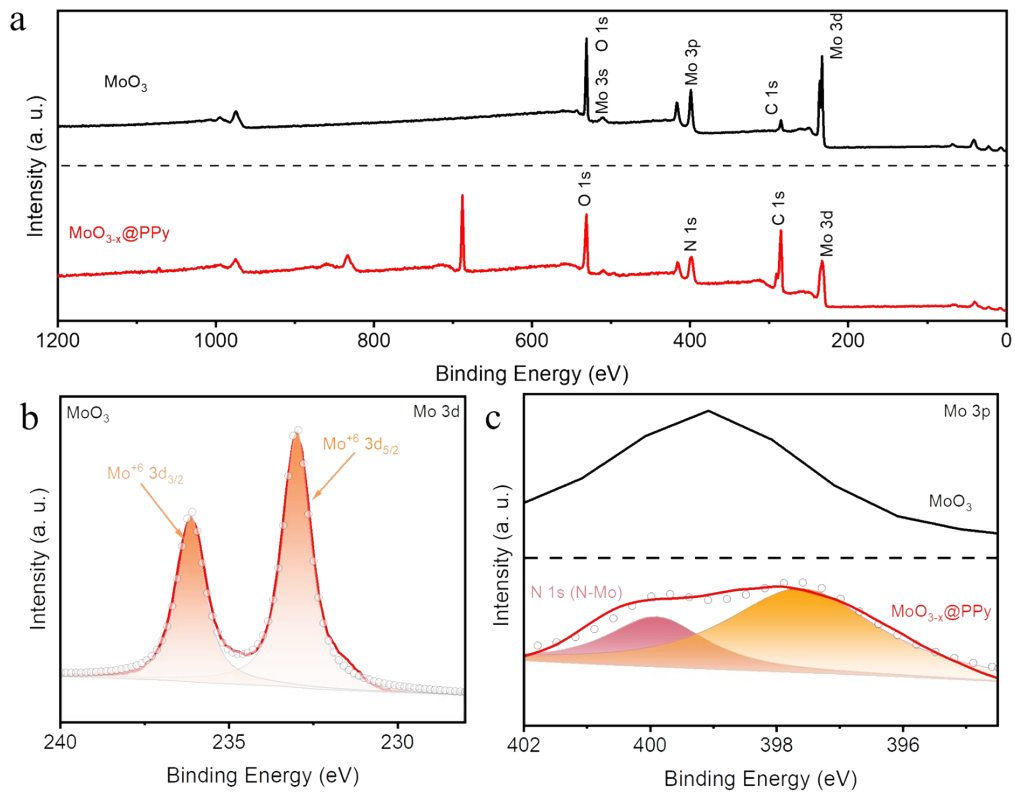

**Figure S3** (a) The XPS survey spectra of the  $\text{MoO}_{3-x}\text{@PPy}$  electrode materials. (b) Mo 3d spectra of the  $\text{MoO}_3$  sample. (c) XPS spectra of the Mo  $3p_{3/2}$  and N 1s orbitals of  $\text{MoO}_3$  and  $\text{MoO}_{3-x}\text{@PPy}$

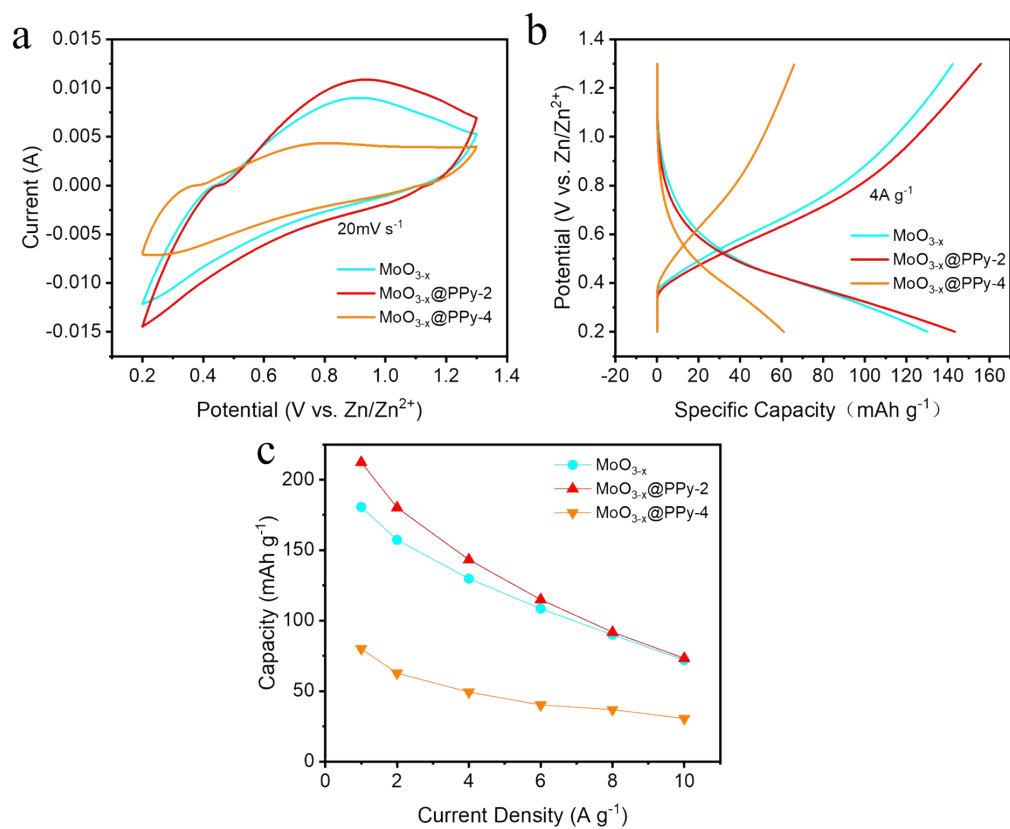

**Figure S4** (a, b) CV and GCD curves for all batteries at a scan rate of 20 mV s<sup>-1</sup> and a current density of 4 A g<sup>-1</sup>. (b) Rate performance of Zn//MoO<sub>3-x</sub> and Zn//MoO<sub>3-x</sub>@PPy batteries with different thicknesses of PPy layers electrodeposited.

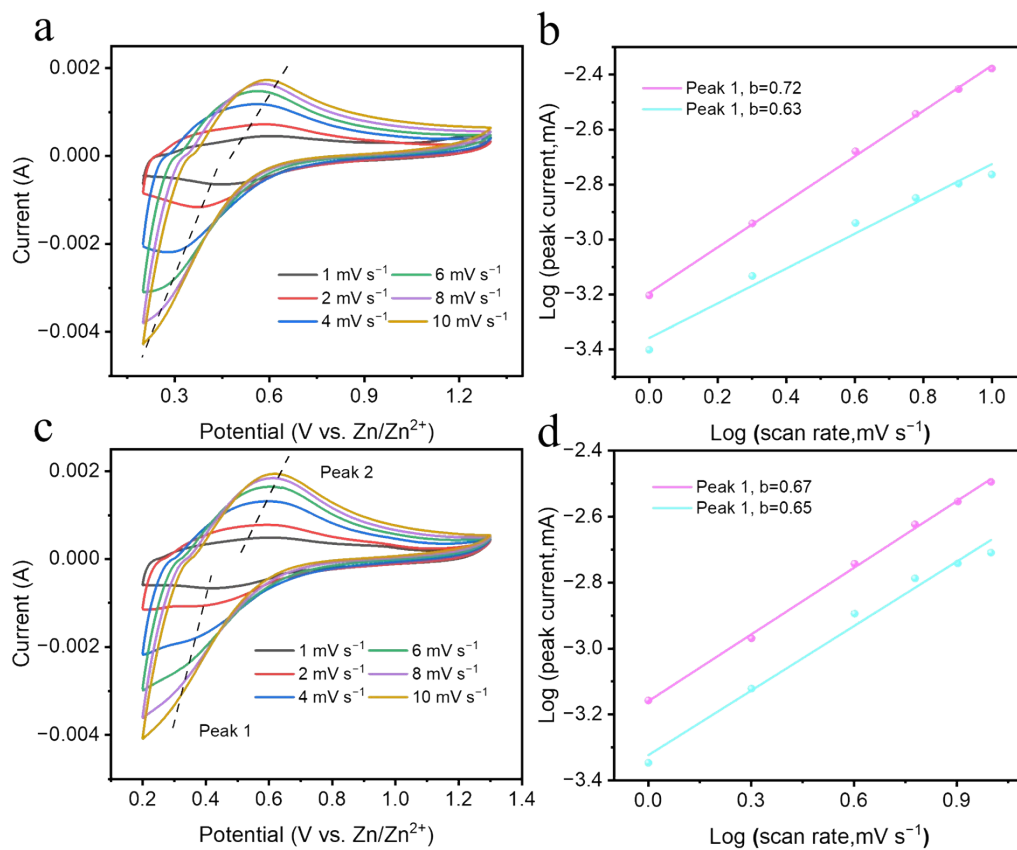

**Figure S5** (a, c) CV curves for  $\text{MoO}_3$  and  $\text{MoO}_{3-x}$  at a range of scan rates of 1, 2, 4, 6, 8 and 10  $\text{mV s}^{-1}$ . (b, d)  $\log(i)$  vs  $\log(v)$  plots of the two peaks in the CV curve for  $\text{MoO}_3$  and  $\text{MoO}_{3-x}$ .

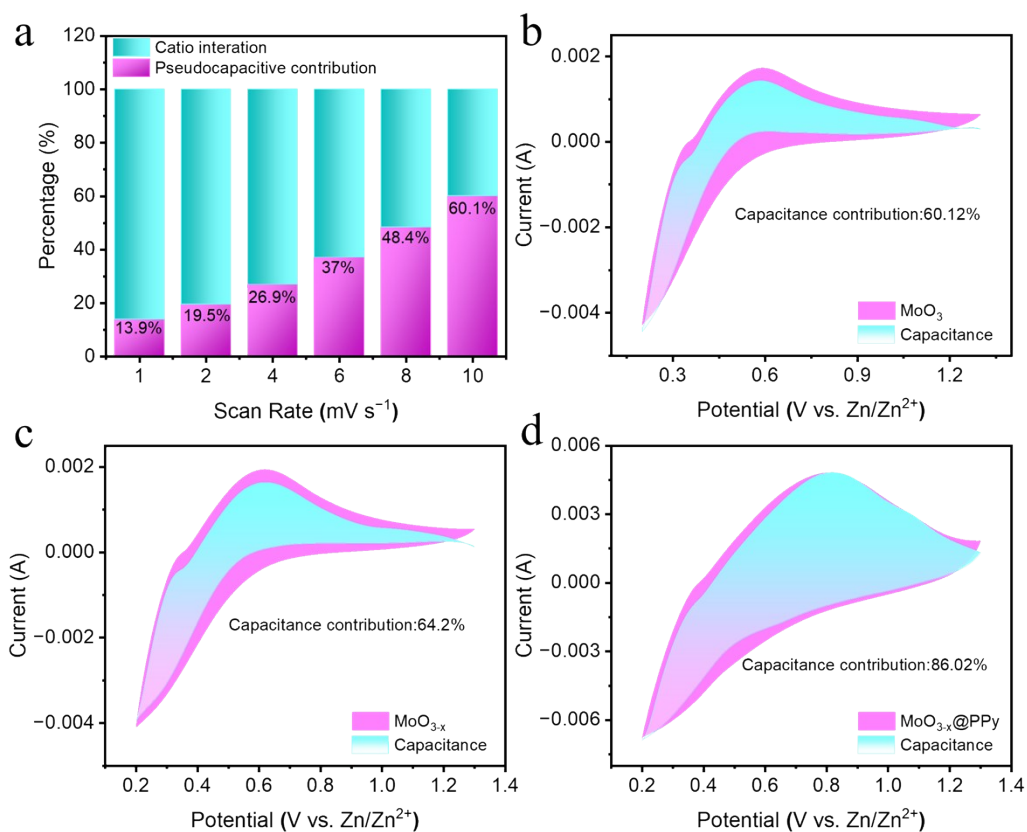

**Figure S6** (a) Ratio of diffusion contribution and capacitance contribution of Zn//MoO<sub>3</sub> and (b, c, and d) Capacitive contribution (inset) and diffusion contribution of MoO<sub>3</sub>, MoO<sub>3-x</sub> and MoO<sub>3-x</sub>@PPy electrodes at 10 mV s<sup>-1</sup>.

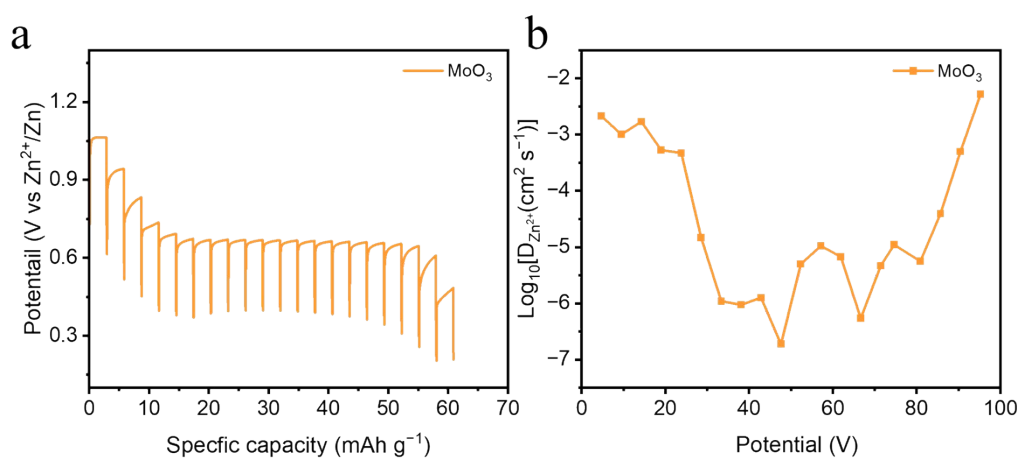

**Figure S7** (a) Discharge GITT curves for Zn//MoO<sub>3</sub> at a current density of 2 A g<sup>-1</sup> and (b) corresponding Zn<sup>2+</sup> coefficients  $D_{Zn^{2+}}$ .
